# Supplementary material for: SfDredd, a Novel Initiator Caspase Possessing Activity on Effector Caspase Substrates in Spodoptera frugiperda
Source: PubMed Central journal article supplement (PMC4792459; doi:10.1371/journal.pone.0151016), 2016-03-15
Supplement: pone.0151016.s004.pdf [file pone.0151016.s004.pdf]

**S4 Table. Sequences used for alignments and phylogenetic tree.**

| Species                        | Name                   | Length | Genbank accession |
|--------------------------------|------------------------|--------|-------------------|
| <i>Aedes aegypti</i>           | AeDredd                | 493 aa | ABI74776.1        |
| <i>Aedes aegypti</i>           | AeDronc                | 449 aa | XP_001655433.1    |
| <i>Bombyx mori</i>             | Bm-caspase-1           | 293 aa | NP_001037050.1    |
| <i>Bombyx mori</i>             | Bm-caspase-3/a (BmICE) | 284 aa | ABC94941.1        |
| <i>Bombyx mori</i>             | Bm-caspase-4           | 497 aa | AEK71902.1        |
| <i>Bombyx mori</i>             | Bm-caspase-5 (BmDronc) | 438 aa | NP_001182396.1    |
| <i>Bombyx mori</i>             | Bm-caspase-6 (BmDredd) | 543 aa | BAF98475.1        |
| <i>Drosophila melanogaster</i> | Dcpl                   | 323 aa | NP_476974.1       |
| <i>Drosophila melanogaster</i> | DECAY                  | 308 aa | AAD54071.2        |
| <i>Drosophila melanogaster</i> | DAMM                   | 255 aa | AAF58613.3        |
| <i>Drosophila melanogaster</i> | DrICE                  | 339 aa | CAA72937.1        |
| <i>Drosophila melanogaster</i> | STRICA (Dream)         | 527 aa | AAF57292.2        |
| <i>Drosophila melanogaster</i> | DmDredd                | 494 aa | AAC33117.1        |
| <i>Drosophila melanogaster</i> | DmDronc                | 450 aa | AAD26625.1        |
| <i>Galleria mellonella</i>     | Gm-caspase-6           | 537 aa | AEK20837.1        |
| <i>Helicoverpa armigera</i>    | Ha-caspase-5           | 453 aa | AEK20835.1        |
| <i>Helicoverpa armigera</i>    | Ha-caspase-6           | 542 aa | AEK20838.1        |
| <i>Heliothis virescens</i>     | Hv-caspase-6           | 547 aa | HQ328982.1        |
| <i>Lymantria dispar</i>        | Ld-caspase-5           | 443 aa | BAL60586.1        |
| <i>Manduca sexta</i>           | Ms-caspase-6           | 543 aa | AEF30497.1        |
| <i>Pieris rapae</i>            | Pr-caspase-5 (partial) | 252 aa | AEK20836.1        |
| <i>Spodoptera exigua</i>       | Se-caspase-5           | 453 aa | AFX60235.1        |
| <i>Spodoptera exigua</i>       | Se-caspase-6           | 548 aa | AFO64608.1        |
| <i>Spodoptera frugiperda</i>   | Sf-caspase-1           | 299 aa | AAC47442.1        |
| <i>Spodoptera frugiperda</i>   | SfDronc                | 447 aa | JX912275          |
| <i>Spodoptera litura</i>       | Spli-caspase-5         | 445 aa | AFJ04535.1        |
| <i>Spodoptera litura</i>       | Spli-caspase-6         | 522 aa | AFJ04536.1        |
